# Supplementary figures and images for: Transposition of a reconstructed Harbinger element in human cells and functional homology with two transposon-derived cellular genes
Source: HighWire-hosted journal article supplement (doi:10.1073/pnas.0707746105), 2008-03-14

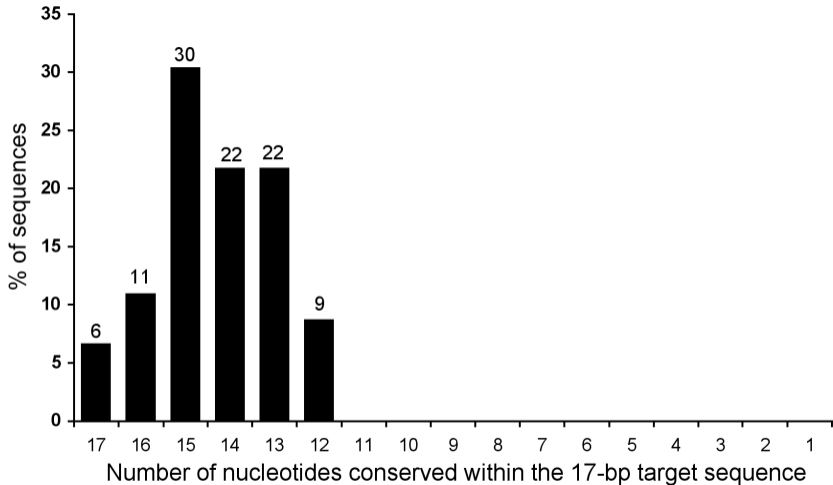

Supplement: 07746Fig9.pdf [file 07746Fig9.pdf]
